# Supplementary material for: A two step synthesis of a key unit B precursor of cryptophycins by asymmetric hydrogenation
Source: publisher site journal article supplement (doi:10.3762/bjoc.7.32), 2011-02-22
Supplement: Additional file 1 [file 1860-5397-7-32-S1.pdf]

# Supporting Information

for

## **A two step synthesis of a key unit B precursor of cryptophycins by asymmetric hydrogenation**

Benedikt Sammet, Mathilde Brax and Norbert Sewald\*

Address: Bielefeld University, Department of Chemistry, Organic and Bioorganic  
Chemistry, Universitätsstraße 25, 33615 Bielefeld, Germany

Email: Norbert Sewald - [norbert.sewald@uni-bielefeld.de](mailto:norbert.sewald@uni-bielefeld.de)

\* Corresponding author

**Full experimental procedures and detailed analytical data for the synthesis of  
10 and 4 including chiral HPLC spectra.**

## General information

CH<sub>2</sub>Cl<sub>2</sub> was dried over CaH<sub>2</sub>. Dry methanol was obtained by carefully adding magnesium shavings and a few iodine crystals to an excess of methanol (Caution!) and subsequent heating to reflux. TLC plates were stained by dipping into ammonium heptamolybdate/cerium(IV) sulfate solution [10.0 g (NH<sub>4</sub>)<sub>6</sub>Mo<sub>7</sub>O<sub>24</sub> · 4 H<sub>2</sub>O, 0.4 g Ce(SO<sub>4</sub>)<sub>2</sub>, 5.4 mL conc. H<sub>2</sub>SO<sub>4</sub>, 180 mL H<sub>2</sub>O], followed by subsequent heating. All NMR spectra were recorded at 298 K in CDCl<sub>3</sub>. TMS was used for internal calibration (<sup>1</sup>H NMR and <sup>13</sup>C NMR: 0.00 ppm). IR spectra were obtained on an instrument containing an ATR accessory. The enantiomeric excess (ee) of the asymmetric hydrogenation reaction utilizing [(COD)Rh-(*R,R*)-Et-DuPhos]BF<sub>4</sub> and its enantiomer for comparison was determined by chiral HPLC (Chiralpak AD, hexane/2-propanol 9:1, 1 mL/min, 254 nm).

## Experimental

### (*Z*)-Methyl 3-(3-chloro-4-methoxyphenyl)-2-(*tert*-butoxycarbonylamino)acrylate

(10):

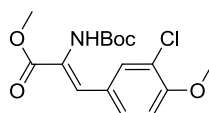

10

According to a slightly modified literature procedure [1] 3-chloro-4-methoxybenzaldehyde (0.449 g, 2.63 mmol) and *rac*-Boc- $\alpha$ -phosphonoglycine trimethyl ester (**9**) (1.00 g, 3.36 mmol) were dissolved in dry CH<sub>2</sub>Cl<sub>2</sub> (26 mL) at 0 °C. 1,1,3,3-Tetramethylguanidine (0.496 mL, 0.455 g, 3.95 mmol) was added over a 15 min period. After 4 h at 0 °C the solution was stirred overnight at rt. CH<sub>2</sub>Cl<sub>2</sub> (100

mL) was added and the organic phase washed with 10% tartaric acid (40 mL), then brine (20 mL) and dried over solid MgSO<sub>4</sub>. The solvent was removed under reduced pressure. Purification by column chromatography (hexane/EtOAc: 3:1) gave olefin **10** (0.761 g, 84%) as a colorless solid. *R<sub>f</sub>* (hexane/EtOAc: 7:3) = 0.47; **<sup>1</sup>H NMR** (300 MHz, CDCl<sub>3</sub>): δ [ppm] = 1.43 (s, 9H, NHCO<sub>2</sub>C(CH<sub>3</sub>)<sub>3</sub>), 3.85 (s, 3H, CO<sub>2</sub>CH<sub>3</sub>), 3.92 (s, 3H, C<sub>ar</sub>OCH<sub>3</sub>), 6.24 (bs, 1H, NH<sub>Boc</sub>), 6.90 (d, *J* = 8.6 Hz, 1H, C<sup>5</sup>H), 7.22 (s, 1H, CO<sub>2</sub>C=CH), 7.40 (dd, *J* = 1.5 Hz, 8.5 Hz, 1H, C<sup>6</sup>H) 7.64 (d, *J* = 2.1 Hz, 1H, C<sup>2</sup>H). **<sup>13</sup>C NMR** (151 MHz, CDCl<sub>3</sub>) δ [ppm] = 28.2 (NHCO<sub>2</sub>C(CH<sub>3</sub>)<sub>3</sub>), 52.7 (CO<sub>2</sub>CH<sub>3</sub>), 56.2 (C<sub>ar</sub>OCH<sub>3</sub>), 81.1 (C(CH<sub>3</sub>)<sub>3</sub>), 111.5 (C<sup>5</sup>H), 122.5 (CO<sub>2</sub>C=CH), 127.7 (C<sup>1</sup> and C<sup>3</sup>Cl), 129.1 (CO<sub>2</sub>C=CH), 130.3 (C<sup>6</sup>H), 131.3 (C<sup>2</sup>H), 155.5 (NHCO<sub>2</sub>C(CH<sub>3</sub>)<sub>3</sub> and C<sup>4</sup>OCH<sub>3</sub>), 166.1 (CO<sub>2</sub>CH<sub>3</sub>). **ESI-MS**: *m/z* 363.9 [M+Na]<sup>+</sup>. **HR-ESI**: calculated for C<sub>16</sub>H<sub>20</sub>N<sub>1</sub>O<sub>5</sub>ClNa [M+Na]<sup>+</sup> 364.09222, found 364.09215. **IR** (neat, cm<sup>-1</sup>): 3211, 3103, 1697, 1504, 804. **Elemental analysis**: calculated (%) for C<sub>16</sub>H<sub>20</sub>ClNO<sub>5</sub>: C 56.32, H 5.90, N 4.10; found: C 56.31, H 6.04, N 4.07.

**(*R*)-Methyl 3-(3-chloro-4-methoxyphenyl)-2-(*tert*-butoxycarbonylamino)propanoate**

**(4):**

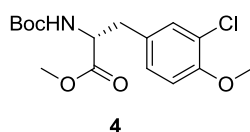

According to a slightly modified literature procedure [1] dry and degassed methanol (16 mL) was added to olefin **10** (0.410 g, 1.20 mmol) and [(COD)Rh-(*R,R*)-Et-DuPhos]BF<sub>4</sub> (0.015 g, 0.023 mmol, 1.9 mol %) in a hydrogenation flask. After three purging cycles the initial suspension was stirred under a hydrogen atmosphere (3–6 bar) for 21.5 h in a hydrogenation apparatus. The solvent was removed in vacuo and the catalyst separated from the already highly pure product by column chromatography (hexane/EtOAc: 3:1) to yield ester **4** (0.399 g, 97%, 98% ee) as a

colorless oil.  $R_f$  (hexane/EtOAc: 7:3) = 0.63; HPLC (Chiralpak AD, hexane/2-propanol 9:1, 1 mL/min, 254 nm):  $t_R$  = 9.8 min (**4**), 11.2 min (**ent-4**).  $[\alpha]_D^{24} = -49$  (c = 0.78 in  $\text{CHCl}_3$ ; Lit.  $[\alpha]_D^{24} = -45$  [2]).  $^1\text{H NMR}$  (300 MHz,  $\text{CDCl}_3$ ):  $\delta$  [ppm] = 1.43 (s, 9H,  $\text{NHCO}_2\text{C}(\text{CH}_3)_3$ ), 2.96 (dd,  $J = 5.9, 14.1$  Hz, 1H,  $\text{CH}^{\text{A}}\text{H}^{\text{B}}$ ), 3.06 (dd,  $J = 5.6$  Hz, 14.0 Hz, 1H,  $\text{CH}^{\text{A}}\text{H}^{\text{B}}$ ), 3.73 (s, 3H,  $\text{CO}_2\text{CH}_3$ ), 3.88 (s, 3H,  $\text{C}_{\text{ar}}\text{OCH}_3$ ), 4.52 (m, 1H,  $\text{C}^{\alpha}\text{H}$ ), 4.99 (d,  $J = 7.5$  Hz, 1H,  $\text{NH}$ ), 6.85 (d,  $J = 8.4$  Hz, 1H,  $\text{C}^{5'}\text{H}$ ), 6.99 (dd,  $J = 2.1$  Hz, 8.4 Hz, 1H,  $\text{C}^{6'}\text{H}$ ), 7.13 (d,  $J = 1.6$  Hz, 1H,  $\text{C}^{2'}\text{H}$ ).  $^{13}\text{C NMR}$  (151 MHz,  $\text{CDCl}_3$ )  $\delta$  [ppm] = 28.3 ( $\text{NHCO}_2\text{C}(\text{CH}_3)_3$ ), 37.2 ( $\text{CH}^{\text{A}}\text{H}^{\text{B}}$ ), 52.3 ( $\text{CO}_2\text{CH}_3$ ), 54.4 ( $\text{C}^{\alpha}\text{H}$ ), 56.1 ( $\text{C}^{4'}\text{OCH}_3$ ), 80.1 ( $\text{C}(\text{CH}_3)_3$ ), 112.1 ( $\text{C}^{5'}\text{H}$ ), 122.3 ( $\text{C}^{3'}\text{Cl}$ ), 128.5 ( $\text{C}^{6'}\text{H}$ ), 129.1 ( $\text{C}^{1'}$ ), 131.1 ( $\text{C}^{2'}\text{H}$ ), 154.1 ( $\text{C}^{4'}\text{OCH}_3$ ), 155.0 ( $\text{NHCO}_2\text{C}(\text{CH}_3)_3$ ), 172.1 ( $\text{CO}_2\text{CH}_3$ ).

The  $^1\text{H}$  and  $^{13}\text{C}$  NMR data are in complete agreement with previously published data, where **4** was synthesized by the chlorination and methylation of D-tyrosine [3]. However, the  $^{13}\text{C}$  NMR shift value of the aromatic carbon  $\text{C}^{3'}\text{Cl}$  (122.3 ppm), where the chloro substituent is attached to, disagrees with specifications from two other references: 135.6 ppm [2] and 132.4 ppm [4]. As we have obtained compound **4** according to a completely different route, we are confident that our data is correct.

**ESI-MS:**  $m/z$  366.0  $[M+Na]^+$ ; 708.6  $[2M+Na]^+$ .

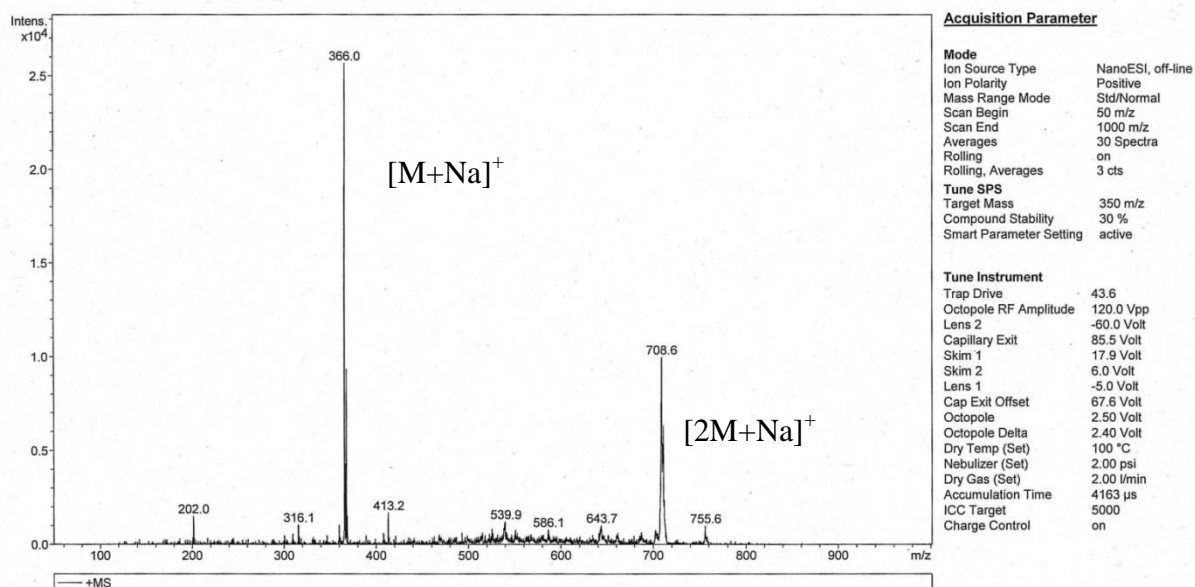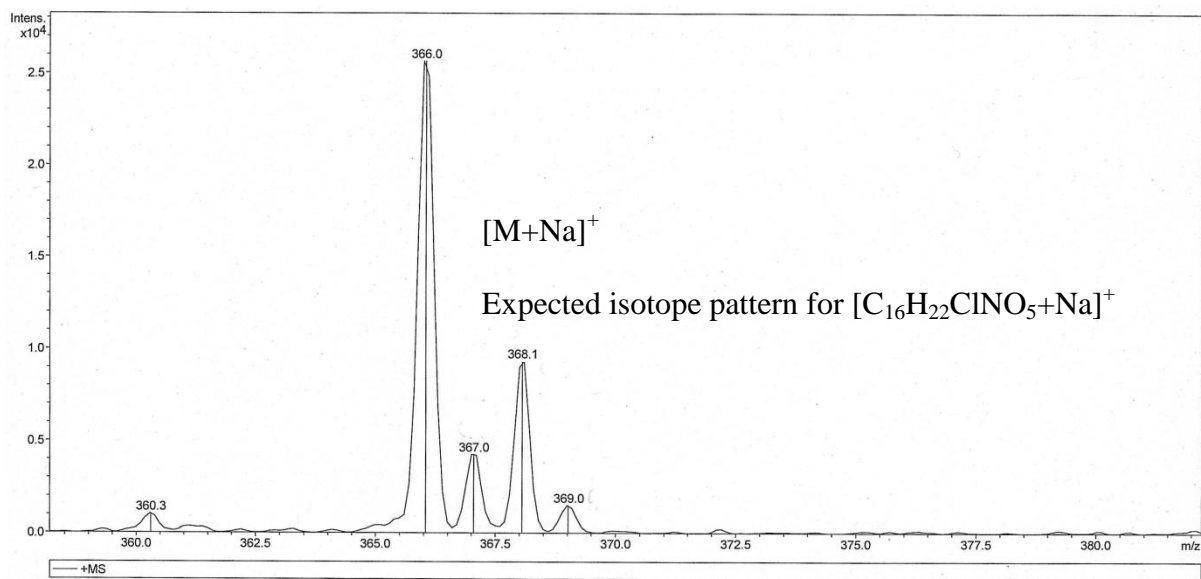

**Elemental analysis:** calculated (%) for  $C_{16}H_{22}ClNO_5$ : C 55.90, H 6.45, N 4.07; found:  
C 55.74, H 6.31, N 4.00.

<sup>1</sup>H NMR: (Z)-Methyl 3-(3-chloro-4-methoxyphenyl)-2-(tert-butoxycarbonylamino)acrylate (10)

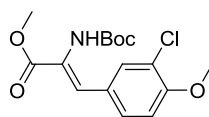

10

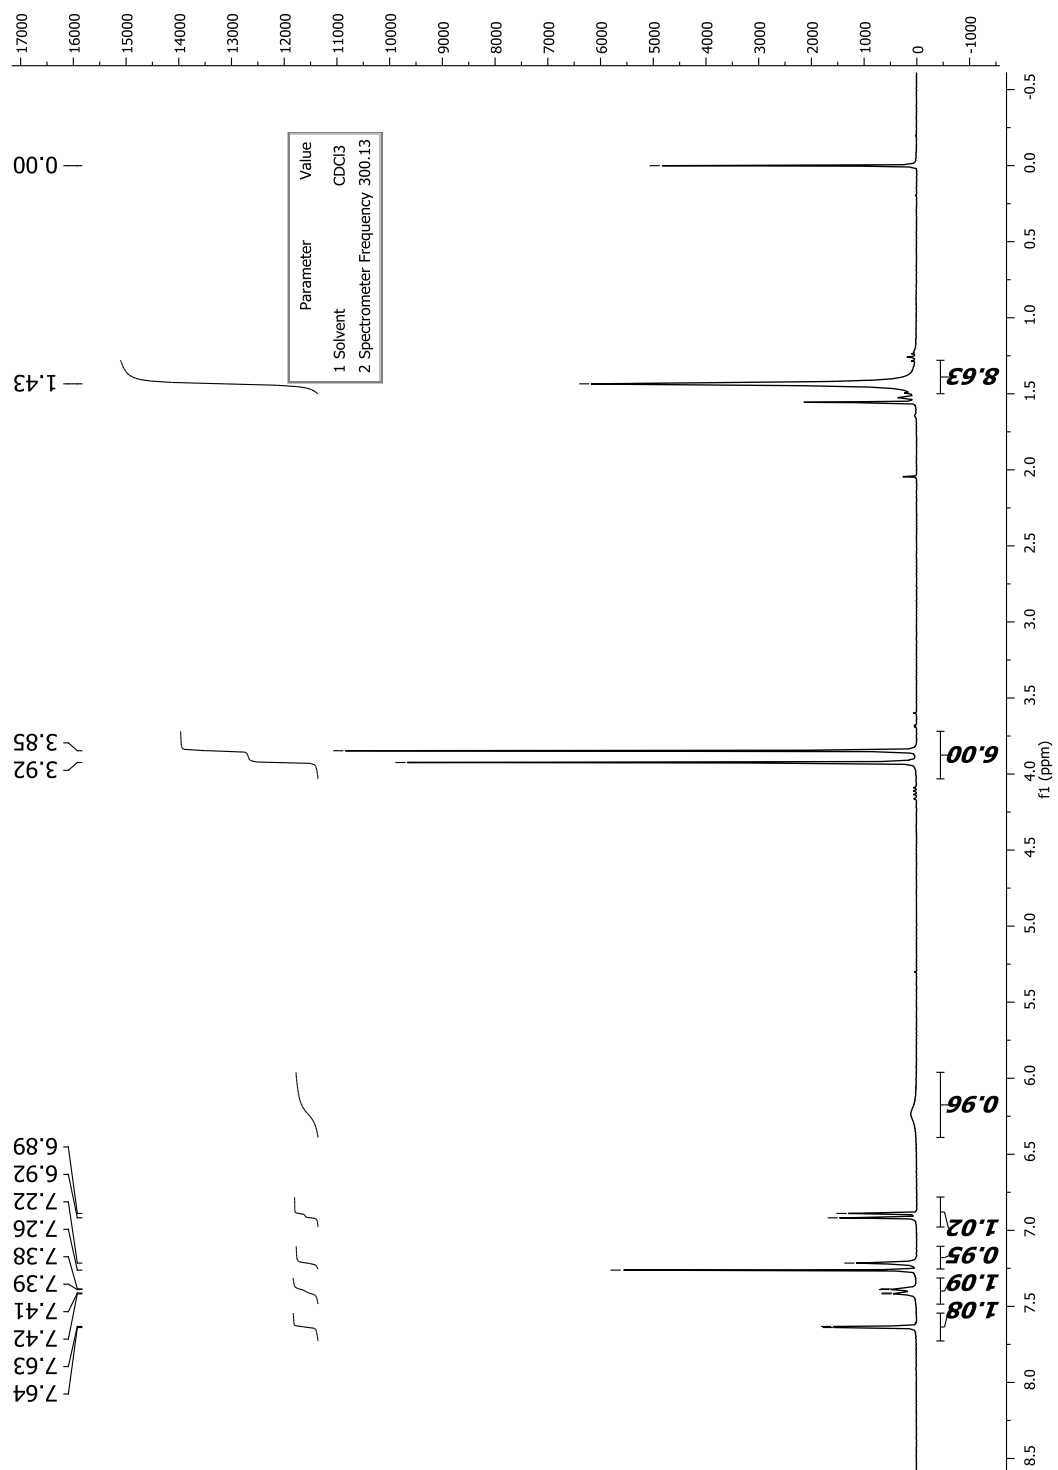

<sup>13</sup>C NMR: (Z)-Methyl 3-(3-chloro-4-methoxyphenyl)-2-(tert-butoxycarbonylamino)acrylate (10)

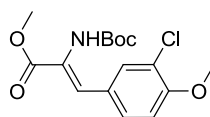

10

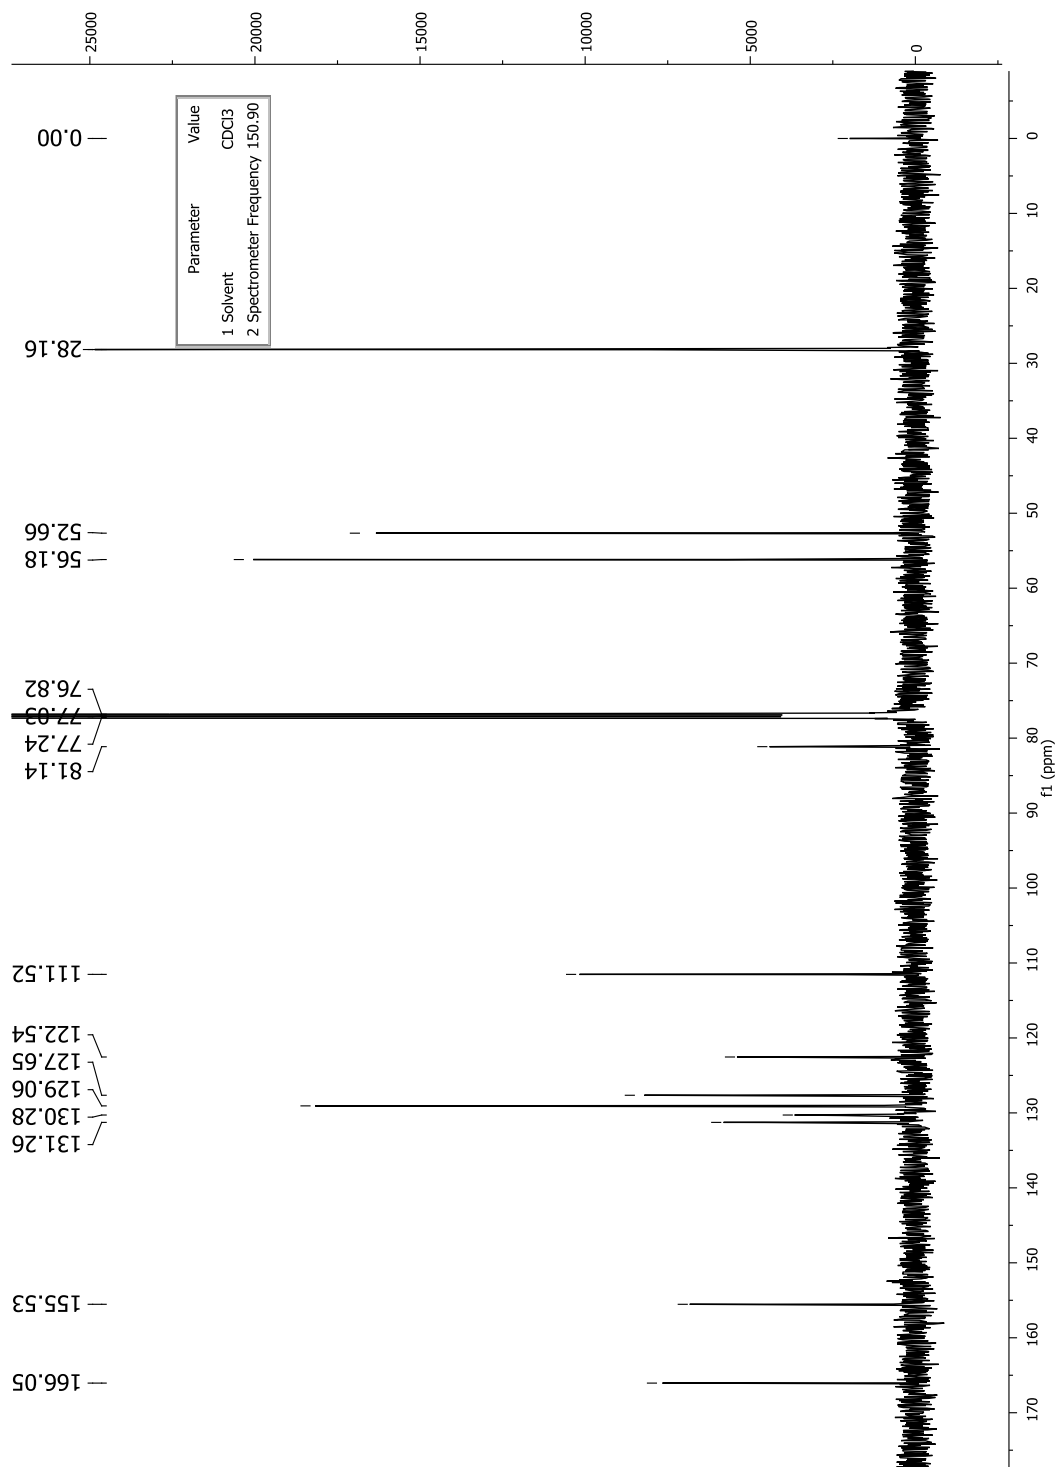

**<sup>1</sup>H NMR: (*R*)-Methyl 3-(3-chloro-4-methoxyphenyl)-2-(*tert*-butoxycarbonyl-amino)propanoate (4)**

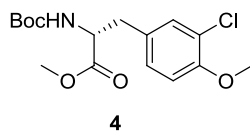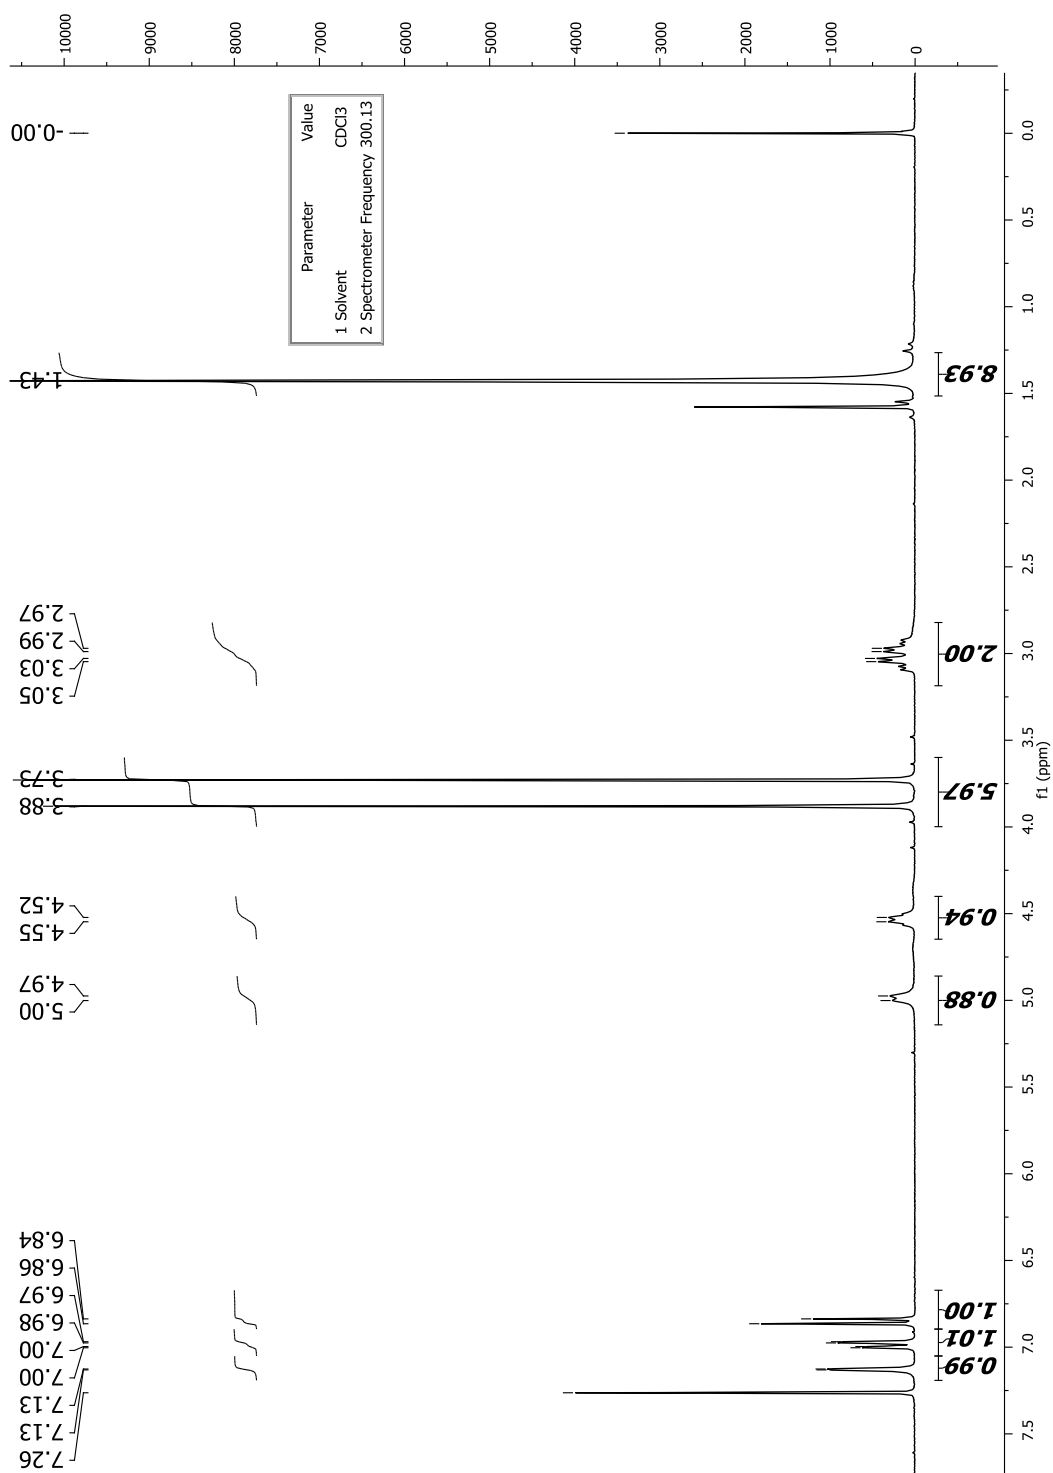



**<sup>13</sup>C NMR: (*R*)-Methyl 3-(3-chloro-4-methoxyphenyl)-2-(*tert*-butoxycarbonyl-amino)propanoate (4)**

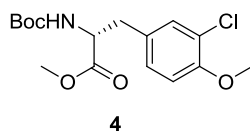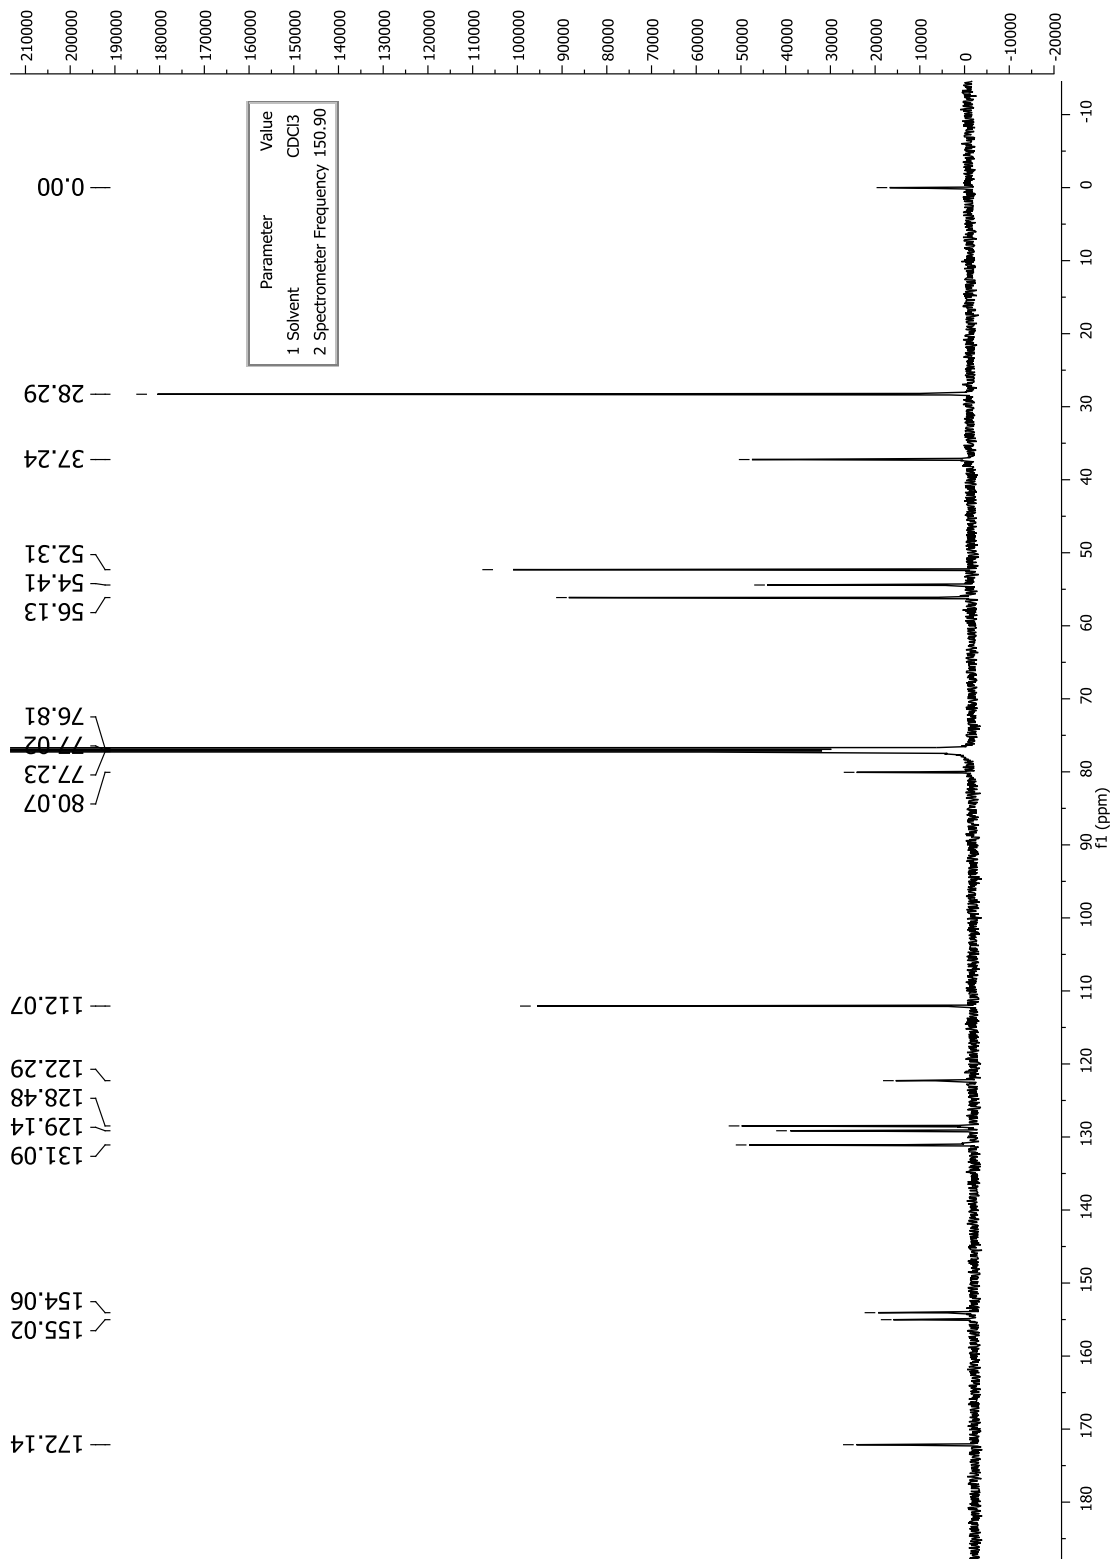

# Chiral HPLC Run: Synthesis of (*R*)-methyl 3-(3-chloro-4-methoxyphenyl)-2-(*tert*-butoxycarbonylamino)propanoate (**4**)

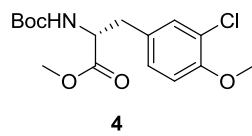

$t_R = \text{ca. } 9.8 \text{ min (4)}$

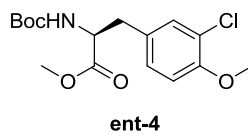

$t_R = \text{ca. } 11.2 \text{ min (ent-4)}$

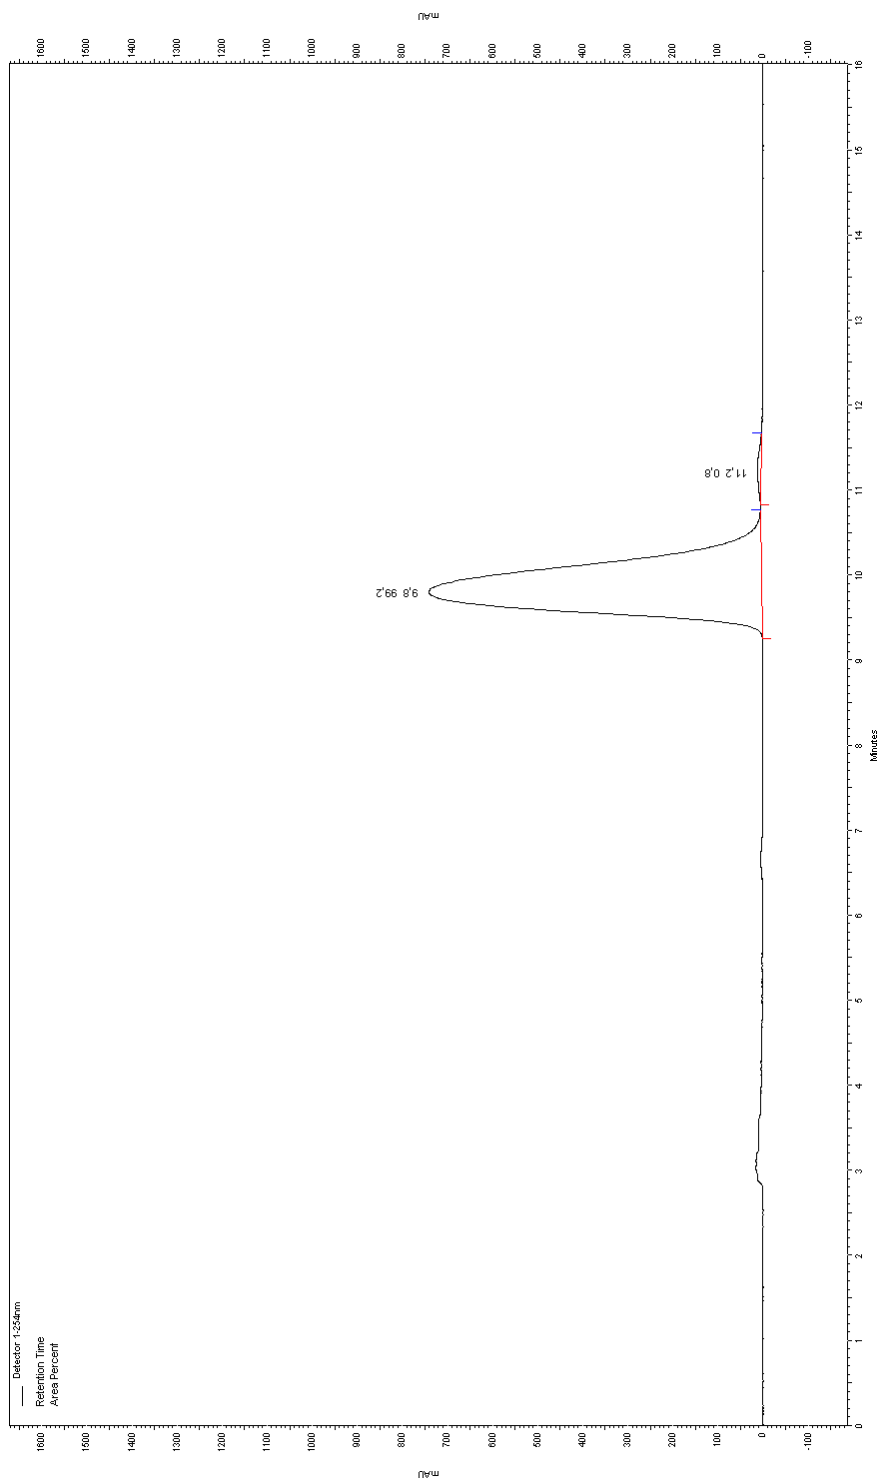

# Chiral HPLC Run: Synthesis of (S)-methyl 3-(3-chloro-4-methoxyphenyl)-2-(tert-butoxycarbonylamino)propanoate (*ent-4*)

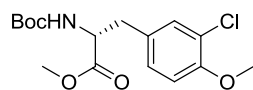

**4**

$t_R = \text{ca. } 9.8 \text{ min (4)}$

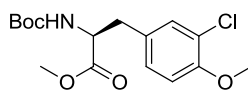

**ent-4**

$t_R = \text{ca. } 11.2 \text{ min (ent-4)}$

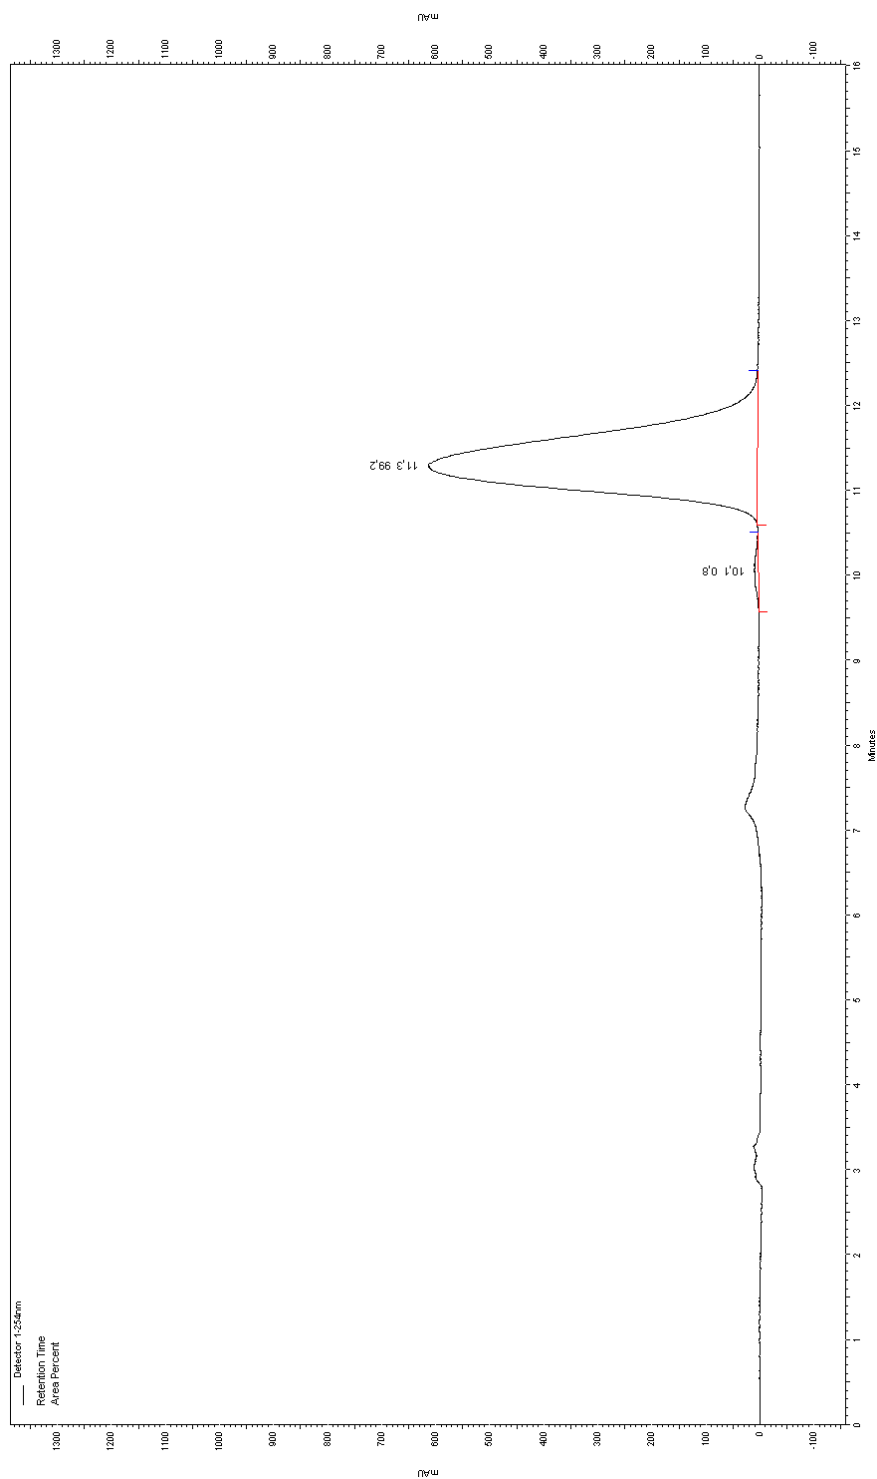

## Chiral HPLC Run: Mixture of 4 and *ent*-4

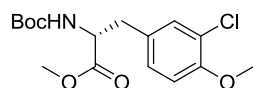

4

$t_R = \text{ca. } 9.8 \text{ min (4)}$

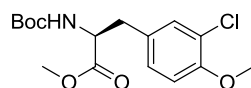

*ent*-4

$t_R = \text{ca. } 11.2 \text{ min (*ent*-4)}$

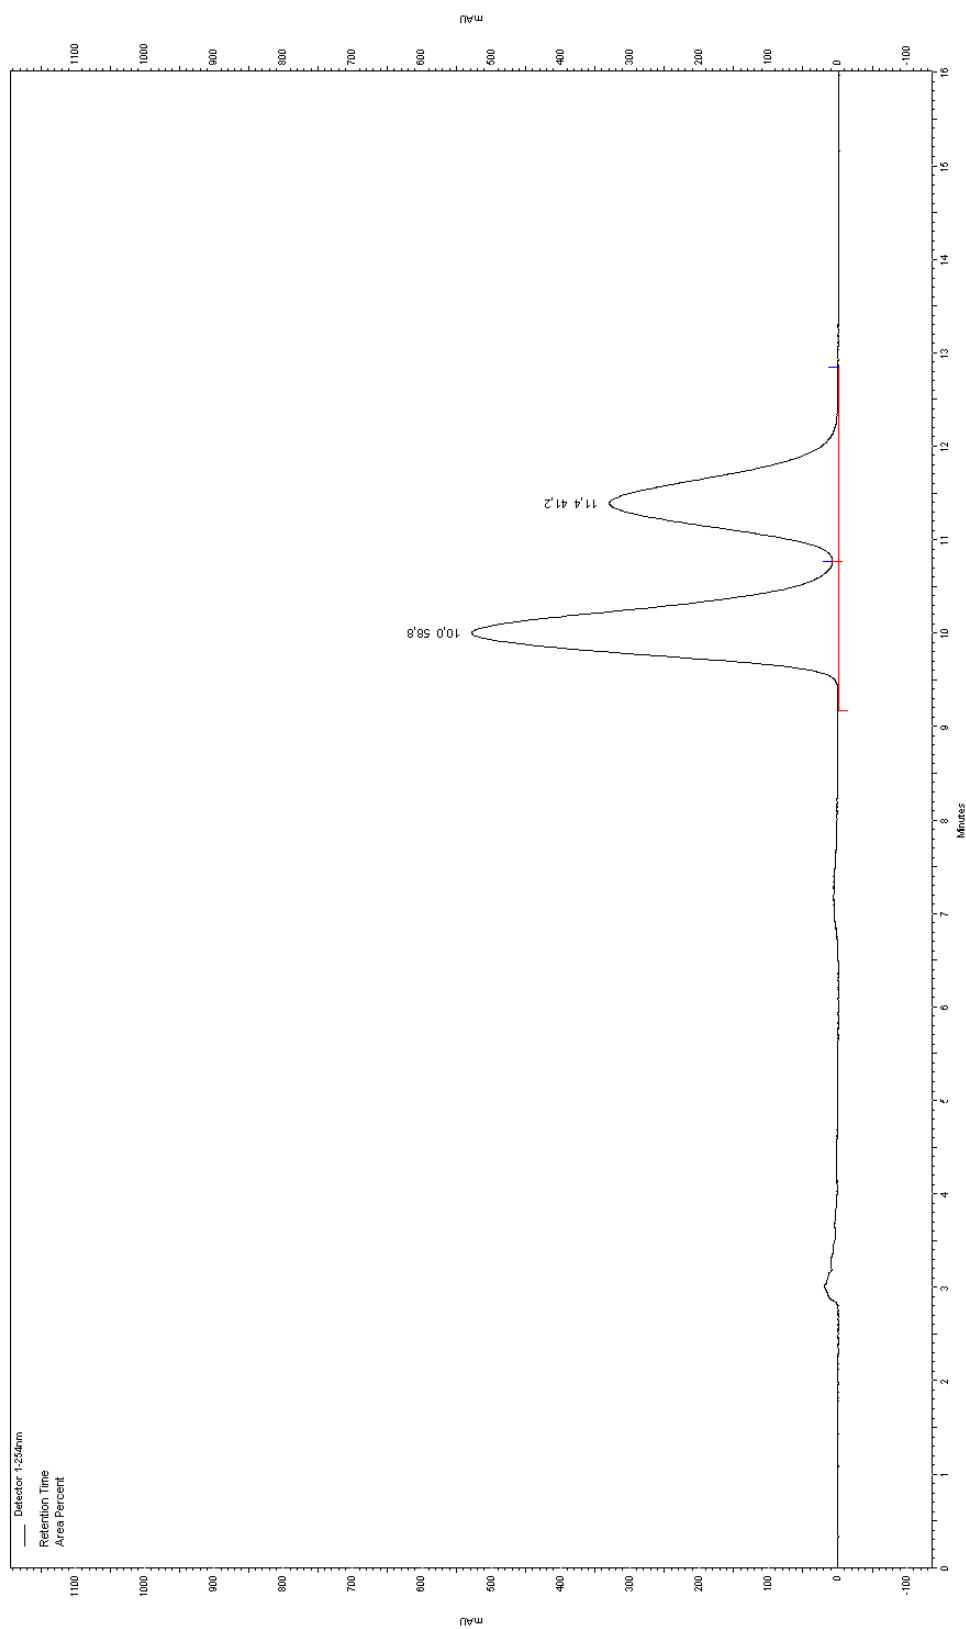

## Literature

- [1] Bower, J. F.; Szeto, P.; Gallagher, T. *Chem. Comm.* **2005**, 5793-5795.
- [2] Barrow, R. A.; Hemscheidt, T.; Liang, J.; Paik, S.; Moore, R. E.; Tius, M. A. *J. Am. Chem. Soc.* **1995**, *117*, 2479-2490
- [3] Nahrwold, M.  $\beta^2$ -Aminosäuren als Bausteine funktionalisierter Cryptophycin-Analoga, Ph.D. Thesis, Bielefeld University, Germany, **2009**. <http://bieson.ub.uni-bielefeld.de/volltexte/2010/1673/> (accessed Dec 19, **2010**).
- [4] McCubbin, J. A.; Maddess, M. L.; Lautens, M. *Org. Lett.* **2006**, *8*, 2993-2996.
